# Supplementary material for: Etiologies and Resistance Profiles of Bacterial Community-Acquired Pneumonia in Cambodian and Neighboring Countries’ Health Care Settings: A Systematic Review (1995 to 2012)
Source: PLoS One. 2014 Mar 13;9(3):e89637. doi: 10.1371/journal.pone.0089637 (PMC3953073; doi:10.1371/journal.pone.0089637)
Supplement: Table S2 — Risk of bias. Notes: **Risk of bias: High indicates bias in each domain. Moderate suggests potential bias in each domain. Low excludes bias in each domain. # Summary of risk of bias: High risk ≥1 high risk of potential bias; or >2 moderate risks of potential bias. Moderate risk >1 moderate risk of potential bias. Low risk: Low risk in all criteria, or <2 moderate risk. (XLSX) [file pone.0089637.s002.xlsx]

## Sheet: Suppl Table 2
Supplemental table S2: Risk of bias
	Study	Design	Methods for selecting study participants		Methods for measuring bacterial pathogens prevalence		Methods to control confounding		Risk of Bias #
			Bias Grade**	Detail	Bias Grade**	Detail	Bias Grade**	Detail
1	Tran 1998	Cross sectional	High	case defintion detailed: yes blinded review of diagnosis: unknown exclusion criteria detailed: no exhaustivity: unknown consecutive recruitment: unknown	Moderate	Serologies: on serum (number per patient unknown), on urine and pleural fluid, techniques not detailed Cultures on blood, techniques described	Moderate	N= 213 patients / Population unknown Study duration ≥ 1 year: yes Hospital level: unclear	High
2	Reechaipichitkul 2002	Cross sectional retrospective	Moderate	case definition detailed: yes blinded review of diagnosis: unknown exclusion criteria detailed: medium exhaustivity: unknown consecutive recruitment: unknown	Low	Serologies: on paired sera, techniques detailed Cultures on several types of samples, techniques detailed	Moderate	N=230 patients, including 120 with bacteriology results / Population unknown Study duration ≥ 1 year: yes Hospital level: unclear	Moderate
3	Reechaipichitkul 2005	Prospective hospital surveillance	Moderate	case defintion detailed: yes blinded review of diagnosis: unknown exclusion criteria detailed: yes exhaustivity: unknown consecutive recruitment: unknown	Moderate	Serologies: on paired sera, techniques described Culture on several types of samples, techniques not described	Low	N=245 patients / Population unknown Study duration ≥ 1 year: yes Hospital level: clear	Moderate
4	Lochindarat 2007	Prospective hospital surveillance	Moderate	case definition detailed: yes blinded review of diagnosis: unknown exclusion criteria detailed: yes exhaustivity: unknown consecutive recruitment: unknown	Low	Serologies: on paired sera, techniques detailed	Low	N=245 patients / Population unknown Study duration ≥ 1 year: yes Hospital level: clear	Low
5	Anh 2007	Case control study	Low	case definition detailed: yes blinded review of diagnosis: yes, tripled exclusion criteria detailed: yes exhaustivity / randomization: unknown	Moderate	Cultures on only 1 type of sample, techniques described	Low	N=220 patients, including 91 pneumonia / Population unknown Study duration ≥ 1 year: yes Hospital level: clear (tertiary)	Low
6	Song 2008	Prospective hospital surveillance	Low	case definition detailed: yes blinded review of diagnosis: unknown, exclusion criteria detailed: yes exhaustivity: yes consecutive recruitment: unknown	Low	Serologies: on paired sera, techniques described Cultures on several types of samples, techniques described	Low	N=1031 cases, including 349 patients with bacteriology results / Population unknown Study duration ≥ 1 year: yes Hospital level: clear (tertiary)	Low
7	Reechaipichitkul 2005	Prospective hospital surveillance	Moderate	case definition detailed: yes blinded review of diagnosis: unknown exclusion criteria detailed: yes exhaustivity: unknown consecutive recruitment: unknown	Low	Serologies: on paired sera, techniques described Culture on several types of samples, techniques described	Moderate	N=44 patients / Population unknown Study duration ≥ 1 year: yes Hospital level: unclear	Moderate
8	Samransamruajkit 2008	Prospective hospital surveillance	Moderate	case definition detailed: yes blinded review of diagnosis: unknown exclusion criteria detailed: yes exhaustivity: unknown consecutive recruitment: unknown	Moderate	Serologies: on paired sera, techniques described	Moderate	N=52 patients / Population unknown Study duration ≥ 1 year: yes Hospital level: yes (tertiary)	High
9	Vu 2011	case control study	High	case defintion detailed: no Blinded review of diagnosis: yes exclusion criteria detailed: no	Moderate	PCR on nasopharyngeal swabs only, techniques detailed	Low	N=550 inpatients, including 274 with bacteriology results / Population=198,792 Study duration ≥ 1 year: yes Hospital level: yes (tertiary)	High
10	Wattanathum 2003	prospective hospital surveillance	Moderate	case definition detailed: yes blinded review of diagnosis: unknown exclusion criteria detailed: yes exhaustivity: unknown consecutive recruitment: unknown	Low	Serologies: on paired sera, techniques and threesholds described Cultures on several types of samples, techniques detailed	Low	N=179 patients / Population unknown Study duration ≥ 1 year: yes Hospital level: clear (secondary)	Low
11	Olsen 2006	prospective hospital surveillance	Low	case definition detailed: yes blinded review of diagnosis: yes, doubled exclusion criteria detailed: yes exhaustivity: yes consecutive recruitment: yes	High	Cultures on sputum, techniques not described	High	N=1064 inpatients, including 65 with bacteriology results / population=438,557 Study duration ≥ 1 year: Hospital level: clear (secondary)	High
12	Phares 2007	Active population based surveillance	High	case definition detailed: yes blinded review of diagnosis: unknown exclusion criteria detailed: no exhaustivity: unknown consecutive recruitment: unknown	Moderate	Serologies: on paired sera, and other samples, techniques described Cultures on several types of samples by PCR, techniques described Convenience sample to confirm absence of legionellosis in <18 years	Low	N=3,489 cases, including 755 with bacteriology results Study duration ≥ 1 year: yes Hospital level: clear (secondary)	High
13	Olsen 2010	Active hospital surveillance (20 health stuctures)	Moderate	case definition detailed: yes blinded review of diagnosis: unknown exclusion: no exhaustivity: unknown consecutive recruitment: unknown	Low	Serologies: on paired sera, on urine, techniques described PCR cultures on nasopharyngeal swabs, techniques described	Low	N=15,403 respiratory infections, including 1730 with bacteriology results / Population unknown tudy duration ≥ 1 year: yes Hospital level: clear (secondary)	Low
14	Prapasiri 2008	Active hospital surveillance (20 health stuctures)	Low	case definition detailed: yes blinded review of diagnosis: unknown exclusion: yes exhaustivity: yes, checked monthly consecutive recruitment: unknown	Moderate	Cultures on blood only, techniques described	Moderate	N=19,300 patients, including 82 with positive bacteriology results / Population=734,000 Study duration ≥ 1 year: yes Hospital level: unclear (primary to secondary)	Moderate
15	Hara 2011	ross sectional	Moderate	case defintion detailed: yes blinded review of diagnosis: unknown exclusion criteria detailed: no exhaustivity: unknown consecutive recruitment: unknown	Low	Cultures on blood and sputum, techniques detailed	Moderate	N=119 patients / Population unknown Study duration ≥ 1 year: yes Hospital level: clear (primary)	Moderate
Unpublished data available in Cambodia, n=5 sources
16	AHC	Hospital surveillance	Moderate	case definition: broad Unblinded review of diagnosis	Low	Cultures on blood only, techniques as described in as described in Phetsouvanh R et al. Am J Trop Med Hyg. 2006 Nov;75(5):978-85.	Low	N=655 bacteriemic inpatients, including 155 fitting the case definition / population: Study duration ≥ 1 year: yes	Moderate
17	NIPH	Surveillance of acute respiratory infections	Low	cased definition: severe CAP	Low	cultures on blood only, standard microbiology techniques	Low	N=164 Study duration ≥ 1 year: yes	Low
18	SHCH	Prospective hospital surveillance of blood stream infections	Moderate	case definition: broad, not very specific to pneumonia Unblinded review of diagnosis	Low	cultures on blood only, standard microbiology techniques, as descrbed in Vlieghe ER et al. PLoS One 2013; 8(3): e59775.	Low	N=~1500 patients hosptalized, including 155 fitting the case definition Study duration ≥ 1 year: yes	Moderate
19	IPC	Prospective hospital surveillance	Low	case definition detailed blinded review of diagnosis exclusion of known tuberculosis and active cancer, and of re-hospitalizations exhaustive and consecutive recruitment	Low	Cultures on sputum and blood as described in Vong S et al. BMC Infect Dis 2013; 13(1): 97.	Low	N=1904 cases, including 905 with bacteriology results / population: Study duration ≥ 1 year: yes	Low
20	NAMRU-2	Influenza Like Illnesses surveillance	High	case definition: broad	Low	Cultures on sputum only; Bacterial isolates were identified by API (BioMerieux)	Low	N=42 tudy duration ≥ 1 year: yes	High
Notes	** Risk of bias:	High indicates bias in each domain
		Moderate suggests potential bias in each domain
		Low excludes bias in each domain
	# Summary of risk of bias:
		High risk ≥ 1 high risk of potential bias; or > 2 moderate risks of potential bias
		Moderate risk > 1 moderate risk of potential bias
		Low risk: Low risk in all criteria, or <2 moderate risk
